# Supplementary material for: Nondestructive Detection and Quantification of Blueberry Bruising using Near-infrared (NIR) Hyperspectral Reflectance Imaging
Source: PubMed Central journal article supplement (PMC5073368; doi:10.1038/srep35679), 2016-10-21
Supplement: srep35679-s1.pdf [file srep35679-s1.pdf]

# **Nondestructive Detection and Quantification of Blueberry Bruising using Near-infrared (NIR) Hyperspectral Reflectance Imaging**

Supplementary Materials

Yu Jiang<sup>1</sup>, Changying Li<sup>1,\*</sup>, and Fumiomi Takeda<sup>2</sup>

<sup>1</sup>College of Engineering, University of Georgia, Athens, Georgia, 30605, United States of America

<sup>2</sup>Appalachian Fruit Research Station, United States Department of Agriculture-Agricultural Research Service, Kearneysville, West Virginia, 25430, United States of America

---

\* Corresponding author at 712F Boyd Graduate Studies, 200 D. W. Brooks Drive, University of Georgia, Athens, Georgia, 30602, United States of America. Phone: (706) 542-4696; Fax: (706) 542-2475; Email: cyli@uga.edu; Website: <http://sensinglab.engr.uga.edu/>.

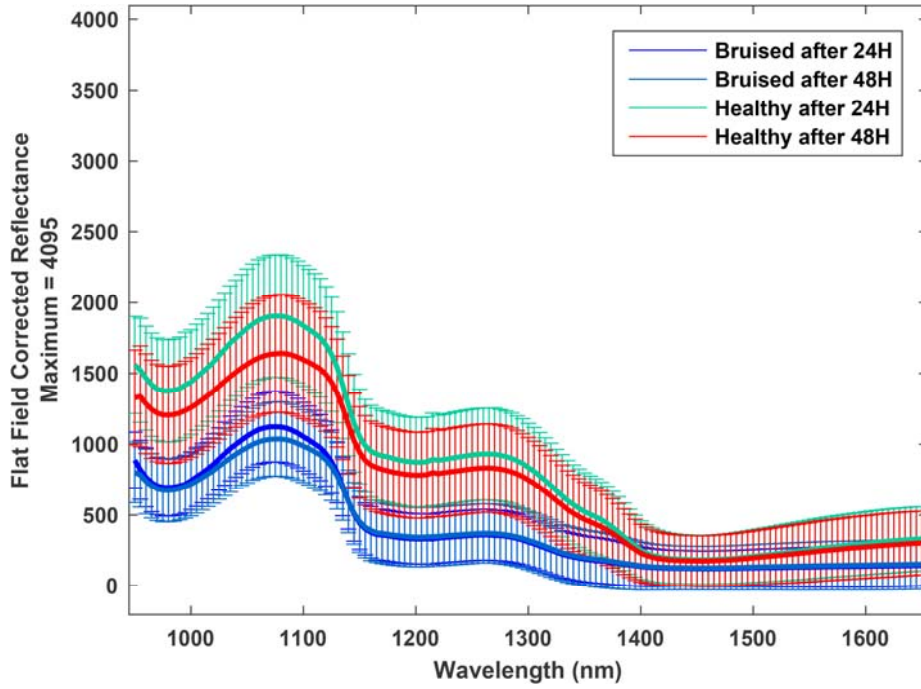

**Figure S1.** The spectra of healthy and bruised tissues stored for 24 and 48 hours, respectively.

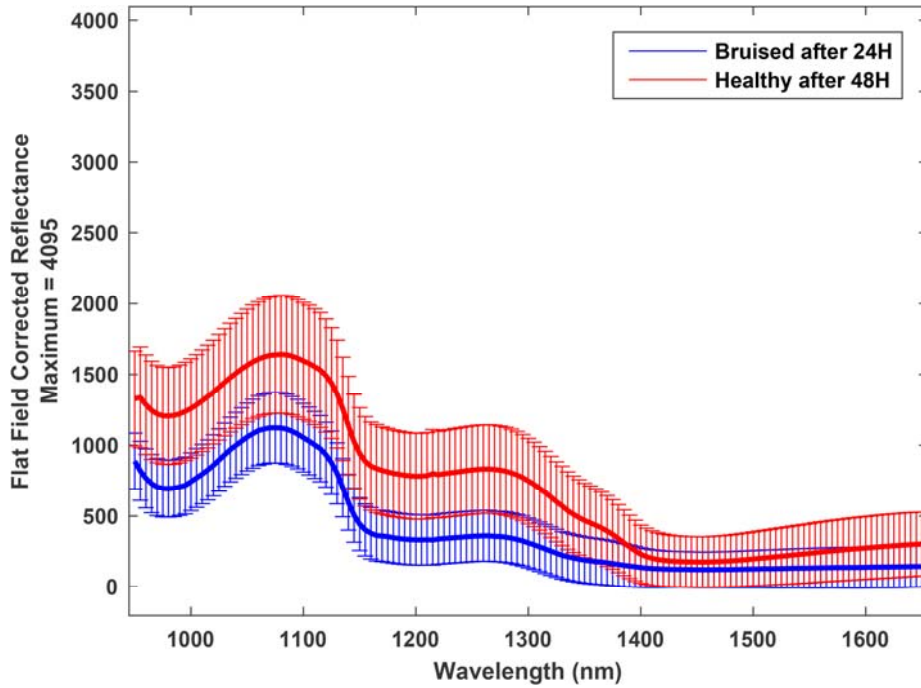

**Figure S2.** The spectra of healthy tissues stored for 48 hours and bruised tissues for 24 hours, respectively.

**Table S1.** MANOVA test criteria and exact F statistics for the hypothesis of no overall treatment effect between the spectra of healthy tissues stored for 48 hours and bruised tissues for 24 hours (H = Type III SSCP matrix for treatment, E = error SSCP matrix, S=1, M=69.5, N=8931, alpha=0.05).

| Statistic              | Value      | F Value | Num DF | Den DF | p-value |
|------------------------|------------|---------|--------|--------|---------|
| Wilks' Lambda          | 0.14786372 | 730.14  | 141    | 17864  | <.0001  |
| Pillai's Trace         | 0.85213628 | 730.14  | 141    | 17864  | <.0001  |
| Hotelling-Lawley Trace | 5.76298441 | 730.14  | 141    | 17864  | <.0001  |
| Roy's Greatest Root    | 5.76298441 | 730.14  | 141    | 17864  | <.0001  |

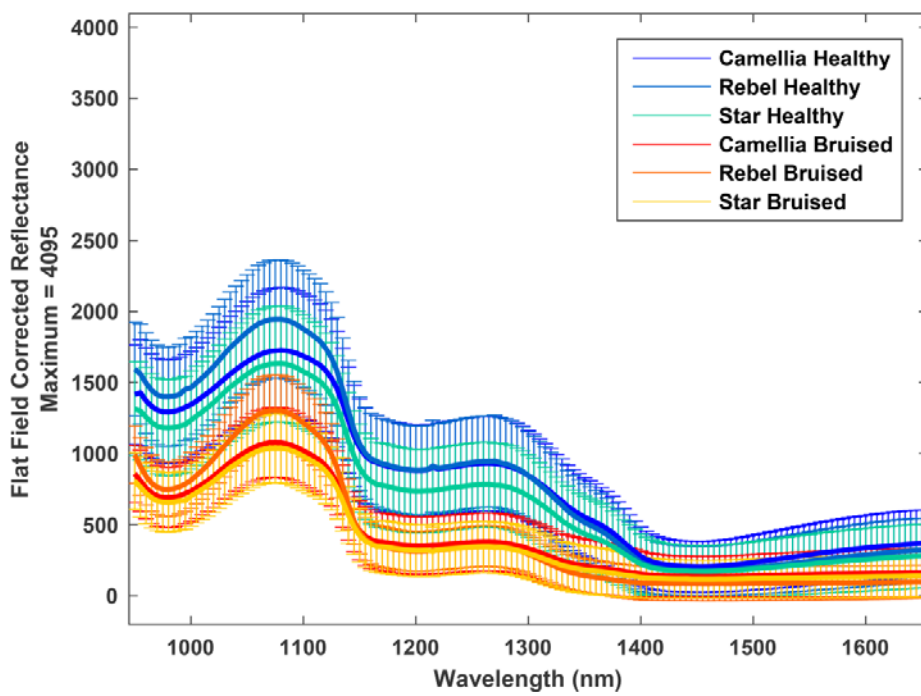

**Figure S3.** The spectra of healthy and bruised tissues for each of the southern highbush blueberry (SHB) cultivars.

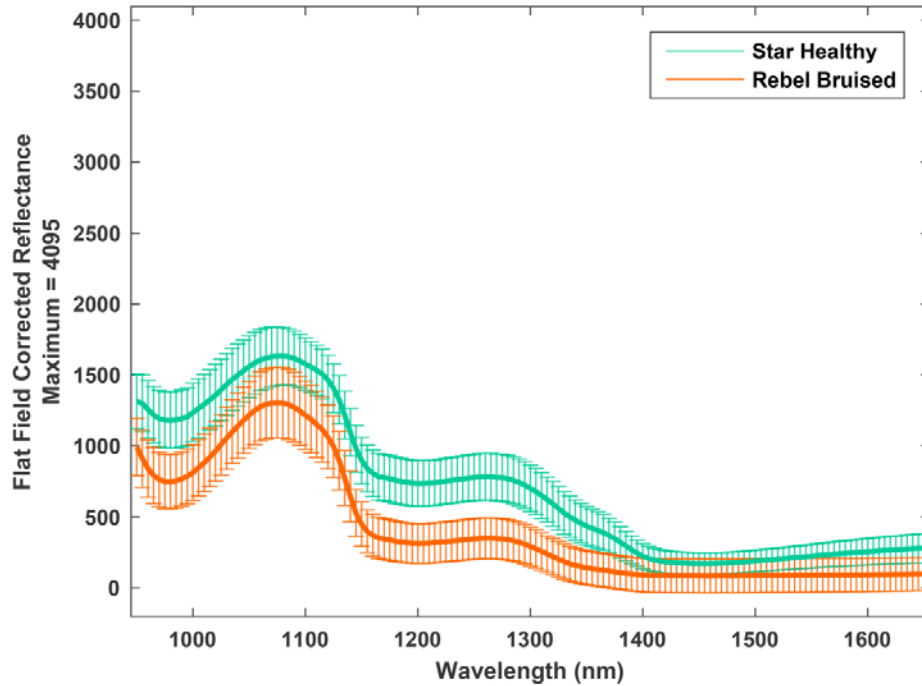

**Figure S4.** The closet spectra of healthy and bruised tissues for the southern highbush blueberry (SHB) cultivars.

**Table S2.** MANOVA test criteria and exact F statistics for the hypothesis of no overall treatment effect between the spectra of healthy tissues (Star) and bruised tissues (Rebel) (H = Type III SSCP matrix for treatment, E = error SSCP matrix, S=1, M=69.5, N=3396, alpha=0.05).

| Statistic              | Value      | F Value | Num DF | Den DF | p-value |
|------------------------|------------|---------|--------|--------|---------|
| Wilks' Lambda          | 0.18422148 | 213.37  | 141    | 6794   | <.0001  |
| Pillai's Trace         | 0.81577852 | 213.37  | 141    | 6794   | <.0001  |
| Hotelling-Lawley Trace | 4.42824853 | 213.37  | 141    | 6794   | <.0001  |
| Roy's Greatest Root    | 4.42824853 | 213.37  | 141    | 6794   | <.0001  |

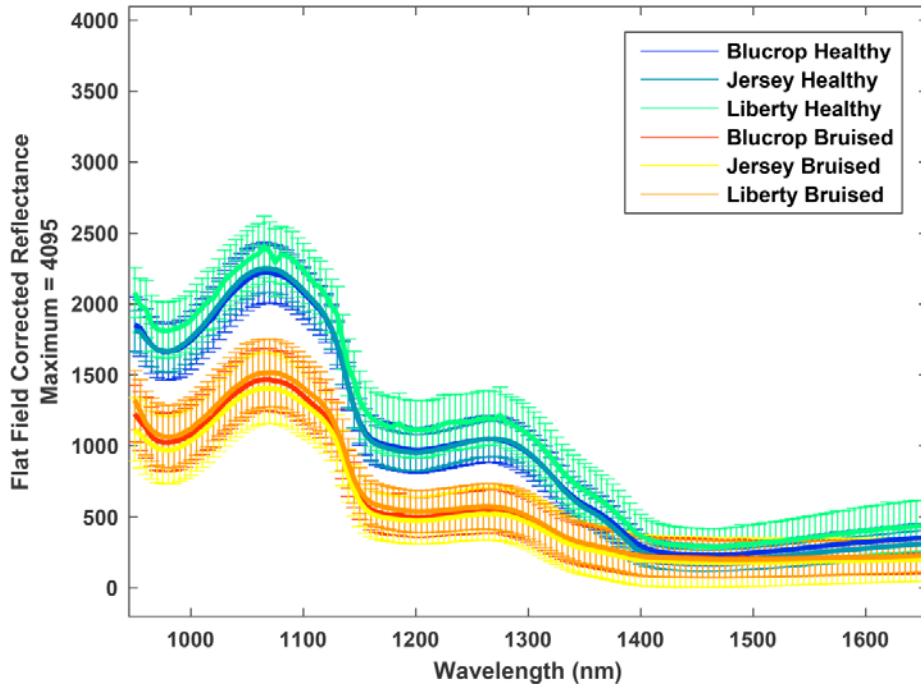

**Figure S5.** The spectra of healthy and bruised tissues for each of the northern highbush blueberry (NHB) cultivars.

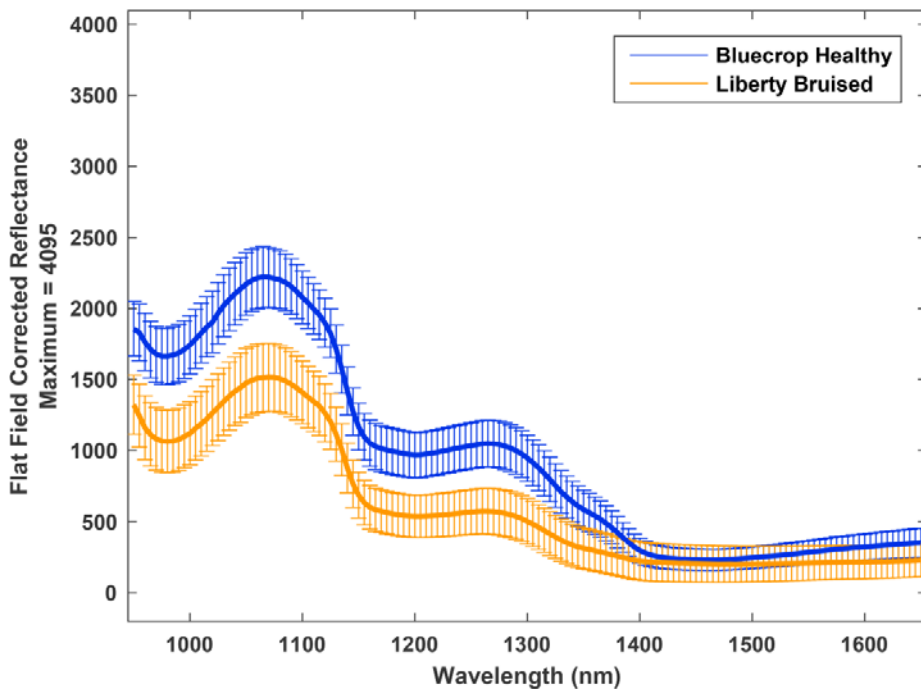

**Figure S6.** The closet spectra of healthy and bruised tissues for the northern highbush blueberry (NHB) cultivars.

**Table S3.** MANOVA test criteria and exact F statistics for the hypothesis of no overall treatment effect between the spectra of healthy tissues (Bluecrop) and bruised tissues (Liberty) (H = Type III SSCP matrix for treatment, E = error SSCP matrix, S=1, M=69.5, N= 35673.5, alpha=0.05).

| Statistic              | Value      | F Value | Num DF | Den DF | p-value |
|------------------------|------------|---------|--------|--------|---------|
| Wilks' Lambda          | 0.26935836 | 1372.60 | 141    | 71349  | <.0001  |
| Pillai's Trace         | 0.73064164 | 1372.60 | 141    | 71349  | <.0001  |
| Hotelling-Lawley Trace | 2.71252637 | 1372.60 | 141    | 71349  | <.0001  |
| Roy's Greatest Root    | 2.71252637 | 1372.60 | 141    | 71349  | <.0001  |

**Table S4.** Multiple comparisons associated with Kruskal-Wallis test for 4 treatments in Figure 5 (a1) using measured firmness (H0: no statistical difference, alpha=0.05, N<sub>control</sub>=30, N<sub>drop</sub>=90).

|                              | Diff     | Lower    | Upper    | Decision  | P-value  |
|------------------------------|----------|----------|----------|-----------|----------|
| Control vs Drop height 15 cm | 70.59444 | 22.34647 | 118.8424 | Reject H0 | 0.00068  |
| Control vs Drop height 23 cm | 136.9056 | 88.65759 | 185.1535 | Reject H0 | 0        |
| Drop height 15 cm vs 23 cm   | 66.31111 | 32.19464 | 100.4276 | Reject H0 | 2.00E-06 |
| Control vs Drop height 31 cm | 158.0556 | 109.8076 | 206.3035 | Reject H0 | 0        |
| Drop height 15 cm vs 31 cm   | 87.46111 | 53.34464 | 121.5776 | Reject H0 | 0        |
| Drop height 23 cm vs 31 cm   | 21.15    | -12.9665 | 55.26647 | FTR H0    | 0.611604 |

**Table S5.** Multiple comparisons associated with Kruskal-Wallis test for 4 treatments in Figure 5 (a2) using the bruise ratio index (H0: no statistical difference, alpha=0.05, N<sub>control</sub>=30, N<sub>drop</sub>=90).

|                              | Diff     | Lower    | Upper    | Decision  | P-value  |
|------------------------------|----------|----------|----------|-----------|----------|
| Control vs Drop height 15 cm | -55.8333 | -104.081 | -7.58536 | Reject H0 | 0.013592 |
| Control vs Drop height 23 cm | -113.111 | -161.359 | -64.8631 | Reject H0 | 0        |
| Drop height 15 cm vs 23 cm   | -57.2778 | -91.3943 | -23.1613 | Reject H0 | 5.70E-05 |
| Control vs Drop height 31 cm | -124.611 | -172.859 | -76.3631 | Reject H0 | 0        |
| Drop height 15 cm vs 31 cm   | -68.7778 | -102.894 | -34.6613 | Reject H0 | 1.00E-06 |
| Drop height 23 cm vs 31 cm   | -11.5    | -45.6165 | 22.61647 | FTR H0    | 1        |

**Table S6.** Multiple comparisons associated with Kruskal-Wallis test for 5 treatments in Figure 5 (a4) using measured firmness (H0: no statistical difference, alpha=0.05, N=300).

|                                              | Diff     | Lower    | Upper    | Decision  | P-value  |
|----------------------------------------------|----------|----------|----------|-----------|----------|
| Control vs Fully-bruised                     | 854.41   | 755.1333 | 953.6867 | Reject H0 | 0        |
| Control vs Drop height 60 cm                 | 234.4733 | 135.1966 | 333.75   | Reject H0 | 0        |
| Fully-bruised vs Drop height 60 cm           | -619.937 | -719.213 | -520.66  | Reject H0 | 0        |
| Control vs Drop height 120 cm                | 433.3967 | 334.12   | 532.6734 | Reject H0 | 0        |
| Fully-bruised vs Drop height 120 cm          | -421.013 | -520.29  | -321.737 | Reject H0 | 0        |
| Drop height 60 cm vs 120 cm                  | 198.9233 | 99.64663 | 298.2    | Reject H0 | 0        |
| Control vs Drop height 120 cm (Padded)       | 50.93667 | -48.34   | 150.2134 | FTR H0    | 1        |
| Fully-bruised vs Drop height 120 cm (Padded) | -803.473 | -902.75  | -704.197 | Reject H0 | 0        |
| Drop height 60 cm vs 120 cm (Padded)         | -183.537 | -282.813 | -84.26   | Reject H0 | 2.00E-06 |
| Drop height 120 cm vs 120 cm (Padded)        | -382.46  | -481.737 | -283.183 | Reject H0 | 0        |

**Table S7.** Multiple comparisons associated with Kruskal-Wallis test for 5 treatments in Figure 5 (a5) using the bruise ratio index (H0: no statistical difference, alpha=0.05, N=300).

|                                              | Diff     | Lower    | Upper    | Decision  | P-value  |
|----------------------------------------------|----------|----------|----------|-----------|----------|
| Control vs Fully-bruised                     | -867.857 | -967.133 | -768.58  | Reject H0 | 0        |
| Control vs Drop height 60 cm                 | -121.58  | -220.857 | -22.3033 | Reject H0 | 0.005868 |
| Fully-bruised vs Drop height 60 cm           | 746.2767 | 647      | 845.5534 | Reject H0 | 0        |
| Control vs Drop height 120 cm                | -329.813 | -429.09  | -230.537 | Reject H0 | 0        |
| Fully-bruised vs Drop height 120 cm          | 538.0433 | 438.7666 | 637.32   | Reject H0 | 0        |
| Drop height 60 cm vs 120 cm                  | -208.233 | -307.51  | -108.957 | Reject H0 | 0        |
| Control vs Drop height 120 cm (Padded)       | -54.05   | -153.327 | 45.22671 | FTR H0    | 1        |
| Fully-bruised vs Drop height 120 cm (Padded) | 813.8067 | 714.53   | 913.0834 | Reject H0 | 0        |
| Drop height 60 cm vs 120 cm (Padded)         | 67.53    | -31.7467 | 166.8067 | FTR H0    | 0.562104 |
| Drop height 120 cm vs 120 cm (Padded)        | 275.7633 | 176.4866 | 375.04   | Reject H0 | 0        |

**Table S8.** Multiple comparisons associated with Kruskal-Wallis test for 4 treatments in Figure 5 (a3) using the firmness predicted by PLSR (H0: no statistical difference, alpha=0.05, N<sub>control</sub>=30, N<sub>drop</sub>=90).

|                              | Diff     | Lower    | Upper    | Decision  | P-value  |
|------------------------------|----------|----------|----------|-----------|----------|
| Control vs Drop height 15 cm | 90.05556 | 41.80854 | 138.3026 | Reject H0 | 5.00E-06 |
| Control vs Drop height 23 cm | 116.7111 | 68.4641  | 164.9581 | Reject H0 | 0        |
| Drop height 15 cm vs 23 cm   | 26.65556 | -7.46024 | 60.77135 | FTR H0    | 0.235624 |
| Control vs Drop height 31 cm | 125.4556 | 77.20854 | 173.7026 | Reject H0 | 0        |
| Drop height 15 cm vs 31 cm   | 35.4     | 1.28421  | 69.51579 | Reject H0 | 0.037137 |
| Drop height 23 cm vs 31 cm   | 8.74444  | -25.3714 | 42.86024 | FTR H0    | 1        |

**Table S9.** Multiple comparisons associated with Kruskal-Wallis test for 5 treatments in Figure 5 (a6) using the firmness predicted by PLSR (H0: no statistical difference, alpha=0.05, N=300).

|                                              | Diff     | Lower    | Upper    | Decision  | P-value |
|----------------------------------------------|----------|----------|----------|-----------|---------|
| Control vs Fully-bruised                     | 785.1067 | 685.83   | 884.3834 | Reject H0 | 0       |
| Control vs Drop height 60 cm                 | 46.92    | -52.3567 | 146.1967 | FTR H0    | 1       |
| Fully-bruised vs Drop height 60 cm           | -738.187 | -837.463 | -638.91  | Reject H0 | 0       |
| Control vs Drop height 120 cm                | 262.74   | 163.4633 | 362.0167 | Reject H0 | 0       |
| Fully-bruised vs Drop height 120 cm          | -522.367 | -621.643 | -423.09  | Reject H0 | 0       |
| Drop height 60 cm vs 120 cm                  | 215.82   | 116.5433 | 315.0967 | Reject H0 | 0       |
| Control vs Drop height 120 cm (Padded)       | 0.51667  | -98.76   | 99.79337 | FTR H0    | 1       |
| Fully-bruised vs Drop height 120 cm (Padded) | -784.59  | -883.867 | -685.313 | Reject H0 | 0       |
| Drop height 60 cm vs 120 cm (Padded)         | -46.4033 | -145.68  | 52.87337 | FTR H0    | 1       |
| Drop height 120 cm vs 120 cm (Padded)        | -262.223 | -361.5   | -162.947 | Reject H0 | 0       |

**Table S10.** ANOVA with post hoc Tukey tests of the bruised fruit number calculated using the bruise ratio index and human assessment for various treatments using Bluecrop cultivar (alpha=0.05, N=4)

| Treatment                   | Mean BFN (HA) | Mean BFN (BR) | Tukey group | p-value |
|-----------------------------|---------------|---------------|-------------|---------|
| Control                     | 11            | 0             | Different   | 0.0001  |
| Fully-bruised               | 25            | 25            | Same        | n/a     |
| Drop height 60 cm           | 10.5          | 1.5           | Different   | <0.0001 |
| Drop height 120 cm (Steel)  | 13.5          | 8.5           | Same        | 0.0839  |
| Drop height 120 cm (Padded) | 6             | 1             | Different   | 0.0015  |

Note: BFN (bruised fruit number per treatment replicate), HA (human assessment), BR (bruise ratio index)

**Table S11.** ANOVA tests of the bruised fruit number calculated using the bruise ratio index and human assessment for various treatments using Jersey cultivar (alpha=0.05, N=4)

| Treatment                   | Mean BFN (HA) | Mean BFN (BR) | Tukey group | p-value |
|-----------------------------|---------------|---------------|-------------|---------|
| Control                     | 1.5           | 1.5           | Same        | 1       |
| Fully-bruised               | 25            | 25            | Same        | n/a     |
| Drop height 60 cm           | 23.5          | 19.25         | Same        | 0.0832  |
| Drop height 120 cm (Steel)  | 13.5          | 8.5           | Different   | 0.0074  |
| Drop height 120 cm (Padded) | 9.5           | 7             | Same        | 0.6365  |

Note: BFN (bruised fruit number per treatment replicate), HA (human assessment), BR (bruise ratio index)

**Table S12.** ANOVA tests of the bruised fruit number calculated using the bruise ratio index and human assessment for various treatments using Liberty cultivar (alpha=0.05, N=4)

| Treatment                   | Mean BFN (HA) | Mean BFN (BR) | Tukey group | p-value |
|-----------------------------|---------------|---------------|-------------|---------|
| Control                     | 0.5           | 0             | Same        | 0.1340  |
| Fully-bruised               | 25            | 25            | Same        | n/a     |
| Drop height 60 cm           | 2             | 0.25          | Same        | 0.0584  |
| Drop height 120 cm (Steel)  | 8             | 5.25          | Same        | 0.0815  |
| Drop height 120 cm (Padded) | 2             | 0.25          | Same        | 0.0584  |

Note: BFN (bruised fruit number per treatment replicate), HA (human assessment), BR (bruise ratio index)



**Table S13.** Summary of the two experiments conducted in this research

| Variables                                | Experiment (Dataset) #1                                                                  | Experiment (Dataset) #2                                                                                                                                                               |
|------------------------------------------|------------------------------------------------------------------------------------------|---------------------------------------------------------------------------------------------------------------------------------------------------------------------------------------|
| Cultivar                                 | Camellia, Rebel, and Star<br>(southern highbush cultivars)                               | Bluecrop, Jersey, and Liberty<br>(northern highbush cultivars)                                                                                                                        |
| Total sample number                      | 300 (100 per cultivar)                                                                   | 1500 (500 per cultivar)                                                                                                                                                               |
| Treatment                                | Control, three bruise treatments<br>dropped from 15, 23, and 31 cm<br>onto steel surface | Control, fully-bruised treatment<br>(dropped from 90 cm onto steel<br>surface for 8 times), three bruise<br>treatments (60 and 120 cm onto<br>steel and 120 cm onto padded<br>surface |
| Treatment replicate                      | 1                                                                                        | 4                                                                                                                                                                                     |
| Sample number per treatment<br>replicate | 5 for control, 45 for bruise<br>treatments                                               | 25                                                                                                                                                                                    |
| Bruising creation                        | Pendulum                                                                                 | Random                                                                                                                                                                                |
| Bruising position                        | Stem, calyx, or equatorial axis                                                          | Random                                                                                                                                                                                |
| Bruise development time                  | 24 and 48 hours                                                                          | 24 hours                                                                                                                                                                              |

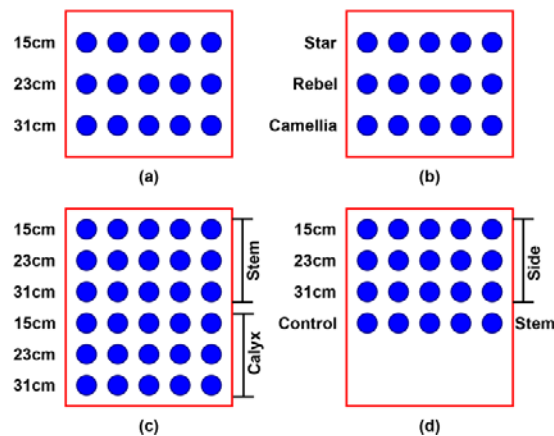

**Figure S7.** Layouts of hyperspectral images acquired for the southern highbush blueberry cultivars stored for 24 and 48 hours, respectively.

For the samples stored for 24 hours, 9 images contained 15 (5 sample replicates \* 3 treatments) blueberry samples each from the same cultivar that had bruises at the same side, and each of the remaining 3 images contained 15 (5 sample replicates \* 3 cultivars) blueberry samples of control treatment that the same side was positioned toward the camera. For the samples stored for 48 hours, each cultivar had four images. The first image contained 30 (5 sample replicates \* 3 treatments \* 2 hitting points) samples that had bruises at the stem and calyx end. The second image contained 15 (5 sample replicates \* 3 treatments) samples that had bruises on the equatorial axis and 5 control group samples that its stem side was positioned toward the camera. The third and fourth images contained 5 control group samples that the calyx side and equatorial axis were positioned toward the camera, respectively. Table S1 includes the detailed layout for each hyperspectral images acquired for the southern highbush blueberry cultivars.

**Table S14.** Detailed treatment information and layout for the hyperspectral images acquired for the southern highbush blueberry cultivars.

| Image                | Cultivar | Treatment                 | Layout        |
|----------------------|----------|---------------------------|---------------|
| HSI-1-1 to HSI-1-3   | Camellia |                           | Figure S5 (a) |
| HSI-1-4 to HSI-1-6   | Rebel    |                           | Figure S5 (a) |
| HSI-1-7 to HSI-1-9   | Star     |                           | Figure S5 (a) |
| HSI-1-10 to HSI-1-12 |          | Control                   | Figure S5 (b) |
| HSI-2-1              | Star     |                           | Figure S5 (c) |
| HSI-2-2              | Star     |                           | Figure S5 (d) |
| HSI-2-3              | Star     | Control (calyx end)       |               |
| HSI-2-4              | Star     | Control (equatorial axis) |               |
| HSI-2-5              | Rebel    |                           | Figure S5 (c) |
| HSI-2-6              | Rebel    |                           | Figure S5 (d) |
| HSI-2-7              | Rebel    | Control (calyx end)       |               |
| HSI-2-8              | Rebel    | Control (equatorial axis) |               |
| HSI-2-9              | Camellia |                           | Figure S5 (c) |
| HSI-2-10             | Camellia |                           | Figure S5 (d) |
| HSI-2-11             | Camellia | Control (calyx end)       |               |
| HSI-2-12             | Camellia | Control (equatorial axis) |               |
